# Supplementary material for: Fabrication and characterization of structurally colored pigments based on carbon-modified ZnS nanospheres
Source: Royal Society of Chemistry journal article supplement (doi:10.1039/c5tc04192a), 2016-01-01
Supplement: c5tc04192a1.pdf [file c5tc04192a1.pdf]

**Supporting information:**

**Fabrication and Characterization of Structurally Colored Pigments  
based on Carbon Modified ZnS Nanospheres**

Fen Wang<sup>a</sup> Xin Zhang<sup>a</sup> Ying Lin<sup>a</sup> Lei Wang<sup>a</sup> Yi Qin<sup>a</sup> and Jianfeng Zhu<sup>a</sup>

School of materials science and engineering, Shaanxi University of Science & Technology, Xi'an

710021, PR China

\*Corresponding author:

*Fen Wang,*

E-mail: wangf@sust.edu.cn. Tel.: +8615114805183.

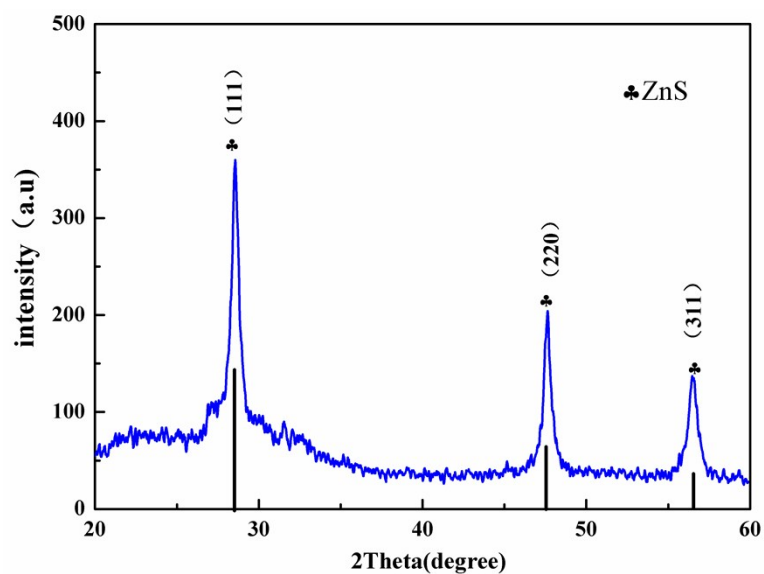

Fig. S1.XRD patterns of ZnS microspheres after calcinations

the XRD patterns of the as-synthesized samples(As shown in Fig. S1) (calcinated in Ar gas protecting at 500 °C for 2 h) confirmed that pure ZnS could be obtained under the current synthetic route.The X-ray diffraction peaks at the  $2\theta$  values of 28.6corresponding to the (111) crystal planes, 47.7 corresponding to the (2 2 0) crystal planes and 56.6 corresponding to the (311) crystal planes which matched well with the reported JCPDS data (Card NO.65-0309).

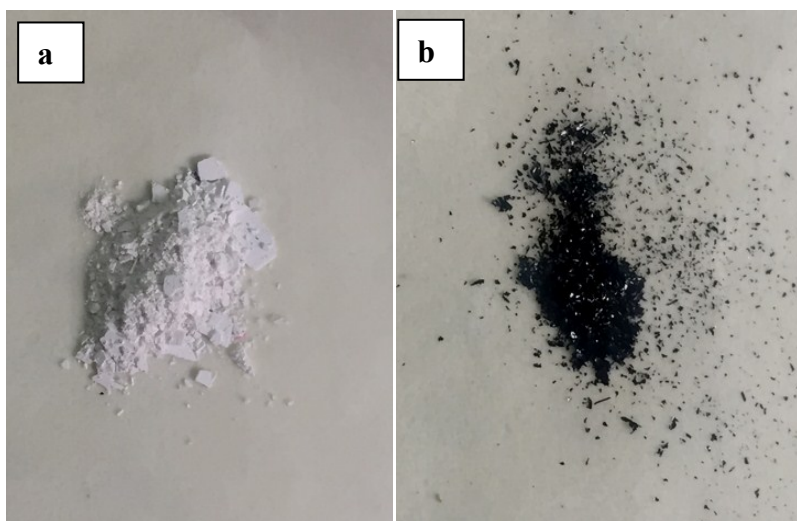

Fig. S2.a. as-prepared fresh ZnS powders also have a white appearance; b. pure PVP calcination at 500 °C for 2 h under argon protection show a black appearance.

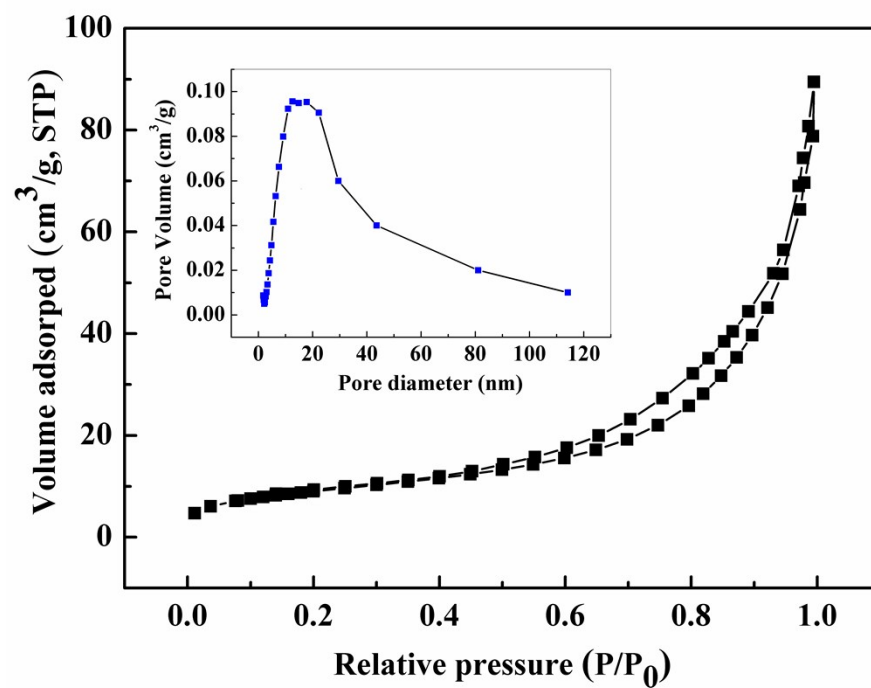

**Fig. S3** Nitrogen adsorption/desorption isotherm and Barrett – Joyner – Halenda (BJH) pore size distribution plot (inset) of the as-prepared ZnS spheres

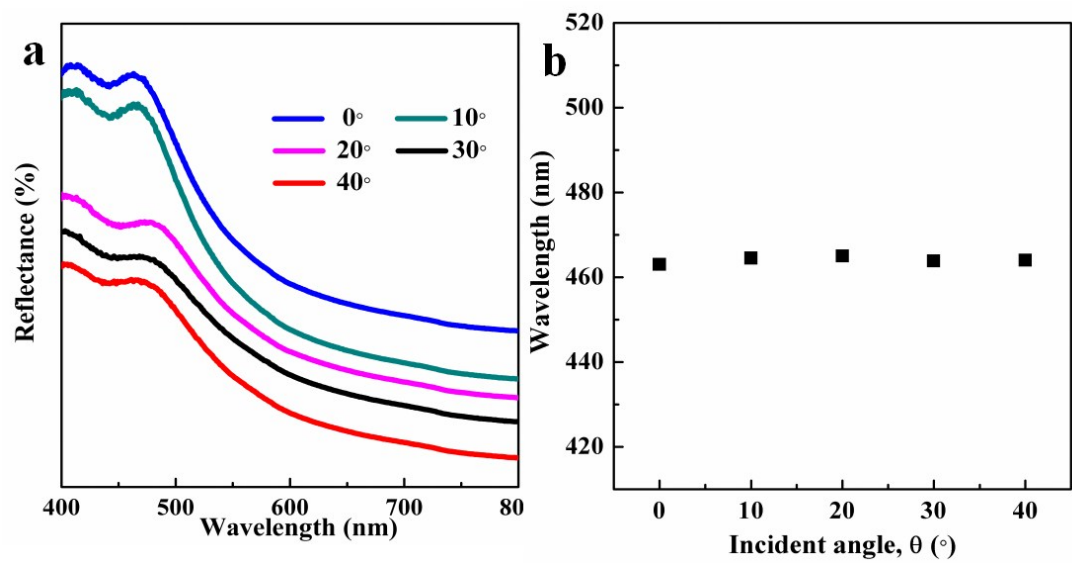

Fig. S4 Reflection spectra of the blue coatings at different incident angles,  $\theta$ , from 0° to 40°. (d-e)

Relationships between the peak position of reflection spectra and incident angle.

Table S1. calculated and measured wavelength positions of the (111) stop bands of the photonic crystal structure color films and the size parameter ( $\pi^*r/\lambda$ )

| colloid | size | $\lambda_{\text{calcd}}$ | $\lambda_{\text{exp}}$ | $\pi^*r/\lambda_{\text{calcd}}$ | $\pi^*r/\lambda_{\text{exp}}$ |
|---------|------|--------------------------|------------------------|---------------------------------|-------------------------------|
| ZnS     | 230  | 782                      | 465                    | 0.46                            | 0.78                          |
|         | 280  | 952                      | 535                    | 0.46                            | 0.82                          |
|         | 325  | 1105                     | 630                    | 0.46                            | 0.81                          |
